# Supplementary material for: Risk factors for suicide in prisons: a systematic review and meta-analysis
Source: PubMed Central journal article supplement (PMC7907684; doi:10.1016/s2468-2667(20)30233-4), 2021-02-10
Supplement: mmc1.pdf [file mmc1.pdf]

# THE LANCET

## Public Health

### **Supplementary appendix**

This appendix formed part of the original submission and has been peer reviewed.  
We post it as supplied by the authors.

Supplement to: Zhong S, Senior M, Yu R, et al. Risk factors for suicide in prisons: a systematic review and meta-analysis. *Lancet Public Health* 2021; published online Feb 9. [http://dx.doi.org/10.1016/S2468-2667\(20\)30233-4](http://dx.doi.org/10.1016/S2468-2667(20)30233-4).

**Appendix. Search databases and results.**

| <b>Databases</b>     | <b>Records</b> |
|----------------------|----------------|
| GLOBAL HEALTH (OVID) | <b>299</b>     |
| MEDLINE (OVID)       | <b>1584</b>    |
| PSYCINFO (OVID)      | <b>2198</b>    |
| EMBASE (OVID)        | <b>3031</b>    |
| CINAHL (EBSCO)       | <b>921</b>     |
| Other resources      | <b>8</b>       |
| <b>TOTAL</b>         | <b>8041</b>    |

## Appendix. Full search strategy for each database

### GLOBAL HEALTH

# 1 exp Suicide/

# 2 suicid\*.mp. [mp=title, abstract, original title, name of substance word, subject heading word, floating sub-heading word, keyword heading word, organism supplementary concept word, protocol supplementary concept word, rare disease supplementary concept word, unique identifier, synonyms]

# 3 suicid\*.ab. or suicid\*.ti.

# 4 #1 or #2 or #3

# 5 (prison\* or felon\* or detain\* or jail\* or custod\* or her majesty's prison or HMP or remand\* or offender\* or institution or penal or inmate\* or correction\* or sentenced or incarcerat\* or gaol\*).ab. or (prison\* or felon\* or detain\* or jail\* or custod\* or her majesty's prison or HMP or remand\* or offender\* or institution or penal or inmate\* or correction\* or sentenced or incarcerat\* or gaol\*).ti.

# 6 (prison\* or felon\* or detain\* or jail\* or custod\* or her majesty's prison or HMP or remand\* or offender\* or institution or penal or inmate\* or correction\* or sentenced or incarcerat\* or gaol\*).mp. [mp=title, abstract, original title, name of substance word, subject heading word, floating sub-heading word, keyword heading word, organism supplementary concept word, protocol supplementary concept word, rare disease supplementary concept word, unique identifier, synonyms]

# 7 exp Prisons/

# 8 #5 or #6 or #7

# 9 #4 and #8

#10 limit #9 to yr="inception - Current"

### MEDLINE

# 1 exp Suicide/

# 2 suicid\*.mp. [mp=title, abstract, original title, name of substance word, subject heading word, floating sub-heading word, keyword heading word, organism supplementary concept word, protocol supplementary concept word, rare disease supplementary concept word, unique identifier, synonyms]

# 3 suicid\*.ab. or suicid\*.ti.

# 4 #1 or #2 or #3

# 5 (prison\* or felon\* or detain\* or jail\* or custod\* or her majesty's prison or HMP or remand\* or offender\* or institution or penal or inmate\* or correction\* or sentenced or incarcerat\* or gaol\*).ab. or (prison\* or felon\* or detain\* or jail\* or custod\* or her majesty's prison or HMP or remand\* or offender\* or institution or penal or inmate\* or correction\* or sentenced or incarcerat\* or gaol\*).ti.

# 6 (prison\* or felon\* or detain\* or jail\* or custod\* or her majesty's prison or HMP or remand\* or offender\* or institution or penal or inmate\* or correction\* or sentenced or incarcerat\* or gaol\*).mp. [mp=title, abstract, original title, name of substance word, subject heading word, floating sub-heading word, keyword heading word, organism supplementary concept word, protocol supplementary concept word, rare disease supplementary concept word, unique identifier, synonyms]

# 7 exp Prisons/

# 8 #5 or #6 or #7

# 9 #4 and #8

# 10 limit #9 to yr="2006 -Current"

## **PSYCHINFO**

# 1 exp Suicide/

# 2 suicid\*.mp. [mp=title, abstract, original title, name of substance word, subject heading word, floating sub-heading word, keyword heading word, organism supplementary concept word, protocol supplementary concept word, rare disease supplementary concept word, unique identifier, synonyms]

# 3 suicid\*.ab. or suicid\*.ti.

# 4 #1 or #2 or #3

# 5 (prison\* or felon\* or detain\* or jail\* or custod\* or her majesty's prison or HMP or remand\* or offender\* or institution or penal or inmate\* or correction\* or sentenced or incarcerat\* or gaol\*).ab. or (prison\* or felon\* or detain\* or jail\* or custod\* or her majesty's prison or HMP or remand\* or offender\* or institution or penal or inmate\* or correction\* or sentenced or incarcerat\* or gaol\*).ti.

# 6 (prison\* or felon\* or detain\* or jail\* or custod\* or her majesty's prison or HMP or remand\* or offender\* or institution or penal or inmate\* or correction\* or sentenced or incarcerat\* or gaol\*).mp. [mp=title, abstract, original title, name of substance word, subject heading word, floating sub-heading word, keyword heading word, organism supplementary concept word, protocol supplementary concept word, rare disease supplementary concept word, unique identifier, synonyms]

# 7 exp Prisons/

# 8 #5 or #6 or #7

# 9 #4 and #8

# 10 limit #9 to yr="2006 -Current"

## **EMBASE**

# 1 exp Suicide/

# 2 suicid\*.mp. [mp=title, abstract, original title, name of substance word, subject heading word, floating sub-heading word, keyword heading word, organism supplementary concept word, protocol supplementary concept word, rare disease supplementary concept word, unique identifier, synonyms]

# 3 suicid\*.ab. or suicid\*.ti.

# 4 #1 or #2 or #3

# 5 (prison\* or felon\* or detain\* or jail\* or custod\* or her majesty's prison or HMP or remand\* or offender\* or institution or penal or inmate\* or correction\* or sentenced or incarcerat\* or gaol\*).ab. or (prison\* or felon\* or detain\* or jail\* or custod\* or her majesty's prison or HMP or remand\* or offender\* or institution or penal or inmate\* or correction\* or sentenced or incarcerat\* or gaol\*).ti.

# 6 (prison\* or felon\* or detain\* or jail\* or custod\* or her majesty's prison or HMP or remand\* or offender\* or institution or penal or inmate\* or correction\* or sentenced or incarcerat\* or gaol\*).mp. [mp=title, abstract, original title, name of substance word, subject heading word, floating sub-heading word, keyword heading word, organism supplementary concept word, protocol supplementary concept word, rare disease supplementary concept word, unique identifier, synonyms]

# 7 exp Prisons/

# 8 #5 or #6 or #7

# 9 #4 and #8

# 10 limit #9 to yr="2006 -Current"

## **CINAHL**

# 1 exp Suicide/

# 2 suicid\*.su.

# 3 suicid\*.ab. or suicid\*.ti.

# 4 #1 or #2 or #3

# 5 (prison\* or felon\* or detain\* or jail\* or custod\* or her majesty's prison or HMP or remand\* or offender\* or institution or penal or inmate\* or correction\* or sentenced or incarcerat\* or gaol\*).ab. or (prison\* or felon\* or detain\* or jail\* or custod\* or her majesty's prison or HMP or remand\* or offender\* or institution or penal or inmate\* or correction\* or sentenced or incarcerat\* or gaol\*).ti.

# 6 (prison\* or felon\* or detain\* or jail\* or custod\* or her majesty's prison or HMP or remand\* or offender\* or institution or penal or inmate\* or correction\* or sentenced or incarcerat\* or gaol\*).mp. [mp=title, abstract, original title, name of substance word, subject heading word, floating sub-heading word, keyword heading word, organism supplementary concept word, protocol supplementary concept word, rare disease supplementary concept word, unique identifier, synonyms]

# 7 exp Prisons/

# 8 #5 or #6 or #7

# 9 #4 and #8

# 10 limit #9 to yr="2006 -Current"

Appendix Figure 1. Suicide risk in people in prison and demographic and institutional factors

**A. Demographic factors**

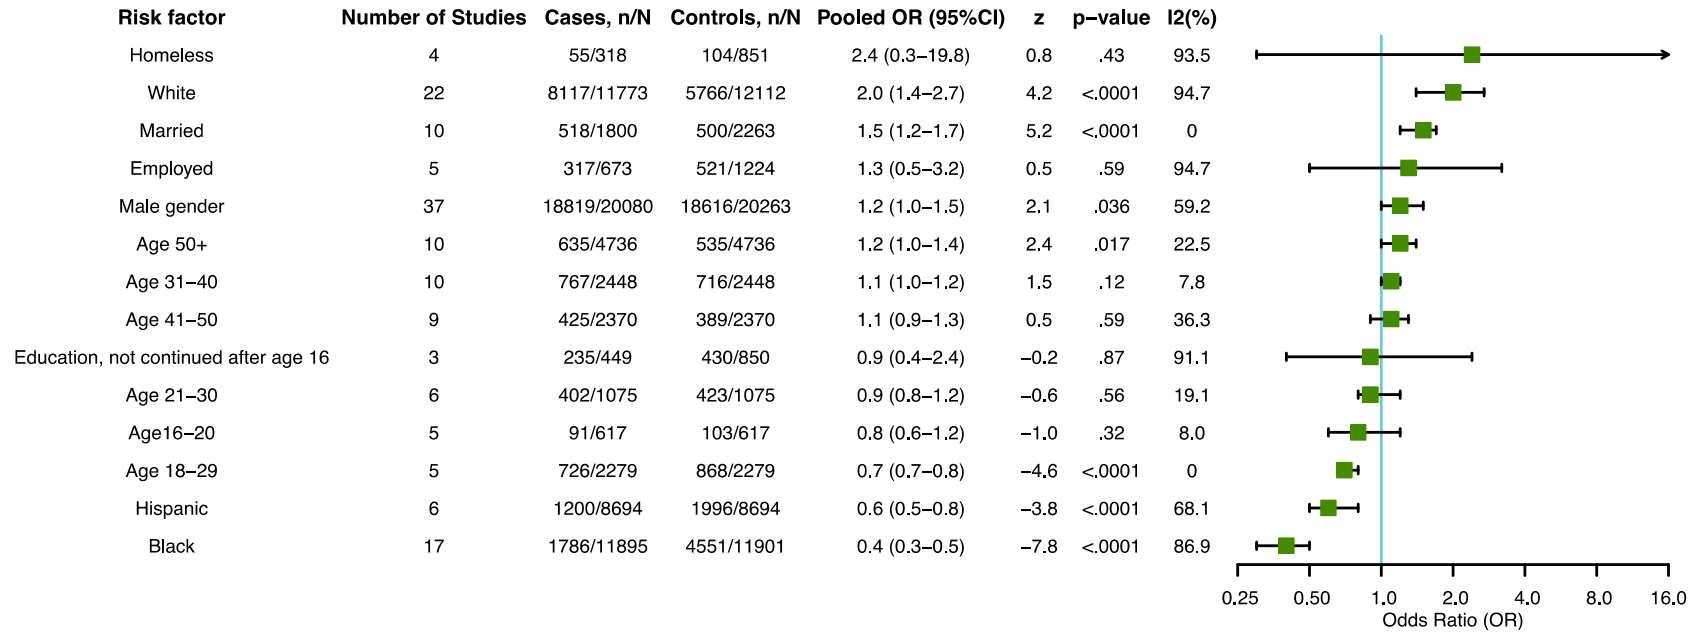

**B. Institutional factors**

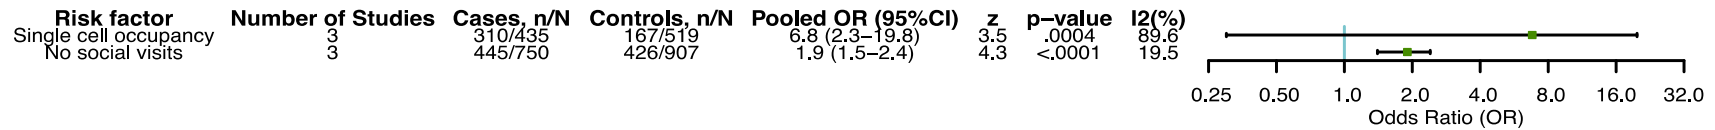

Note: n = number with risk factor. N = total number of cases/controls.

**Appendix Table 1. Characteristics of updated studies on risk factors associated with suicide in prison**

| First author, year                                              | Location          | Period    | Population studied                                                                       | Control group                                                                  | Cases, N | Age (yrs)                 |
|-----------------------------------------------------------------|-------------------|-----------|------------------------------------------------------------------------------------------|--------------------------------------------------------------------------------|----------|---------------------------|
| Group 1 study (case-control)                                    |                   |           |                                                                                          |                                                                                |          |                           |
| Humber (2013) <sup>1</sup>                                      | England and Wales | 2005-2008 | A consecutive case series of suicides in all prisons in England and Wales                | Matched for gender, age, establishment type and date of reception into prison. | 220      | 15-67                     |
| Group 2 studies (compare to average or total prison population) |                   |           |                                                                                          |                                                                                |          |                           |
| Austin (2014) <sup>2</sup>                                      | Australia         | 1996-2010 | All suicides in South Australian prisons                                                 | TPP (mid year)<br>External control                                             | 21       | 17-80                     |
| Baillargeon (2009) <sup>3</sup>                                 | United States     | 2006-2007 | All suicides within the Texas Department of Criminal Justice                             | TPP                                                                            | 41       | ≥16                       |
| Bedoya (2009) <sup>4</sup>                                      | Spain             | 1990-2005 | All suicides in prisons in Catalonia (included those occurring during leave/in hospital) | AAP                                                                            | 65       | Not reported              |
| Betz (2011) <sup>5</sup>                                        | United States     | 2004-2008 | All suicides in Colorado prisons                                                         | TPP                                                                            | 64       | Not reported              |
| Bird (2008) <sup>6</sup>                                        | Scotland          | 1994-2003 | All suicides in male prisons in Scotland                                                 | ADP<br>External control                                                        | 108      | ≥15                       |
| Brittain (2013)/NY correctional services <sup>7</sup>           | United States     | 2001-2009 | All suicides in NY state facilities                                                      | TPP (mid-year)                                                                 | 121      | ≥16                       |
| Carson (2020)a <sup>8</sup>                                     | United States     | 2000-2016 | All suicides in local jails in USA                                                       | ADP                                                                            | 5207     | Youngest≤17,<br>oldest≥55 |
| Carson (2020)b <sup>9</sup>                                     | United States     | 2001-2016 | All suicides in state prisons in USA                                                     | Person-years in prison                                                         | 3300     | Youngest≤17,<br>oldest≥55 |



|                                   |                                                      |           |                                                                                                                                                                         |                                    |      |                |
|-----------------------------------|------------------------------------------------------|-----------|-------------------------------------------------------------------------------------------------------------------------------------------------------------------------|------------------------------------|------|----------------|
| Castelpietra (2018) <sup>10</sup> | Italy                                                | 2010-2016 | All male suicide cases in North-East Italian prisons                                                                                                                    | AAP                                | 29   | ≥18            |
| Choi (2019) <sup>11</sup>         | United States                                        | 2005-2014 | All suicides in prisons in the USA                                                                                                                                      | TPP<br>External control            | 1727 | 14-82          |
| Daniel (2006) <sup>12</sup>       | United States                                        | 1992-2002 | All suicides in prisons in the USA                                                                                                                                      | TPP<br>External control            | 37   | 18-53          |
| Duthe (2013) <sup>13</sup>        | France                                               | 2006-2009 | All suicides in male prisons in France                                                                                                                                  | Person-years                       | 353  | ≥18            |
| Duthe (2014) <sup>14</sup>        | France                                               | 2006-2009 | All suicides in French prisons                                                                                                                                          | Person-years                       | 377  | Across all age |
| Esposito (2017) <sup>15</sup>     | Italy                                                | 2002-2015 | All suicides in Italian prisons                                                                                                                                         | ADP                                | 716  | 18-72          |
| Favril (2018) <sup>16</sup>       | Belgium                                              | 2000-2016 | All suicides in Belgian prisons                                                                                                                                         | AAP<br>External control            | 262  | 19-72          |
| Fazel (2017) <sup>17</sup>        | 24 countries in Europe, Australia, and North America | 2011-2014 | All suicides from any prison                                                                                                                                            | AAP                                | 2810 | Not reported   |
| Fritz (2020) <sup>18</sup>        | 10 countries in South America                        | 2000-2017 | Suicides in all prisons in Brazil, Chile, Colombia, Ecuador, Guyana, Paraguay, Peru, Uruguay; Federal prisons in Argentina; a single maximum security prison in Bolivia | Person-years in prison             | 1324 | Not reported   |
| Gauthier (2015) <sup>19</sup>     | Switzerland                                          | 2000-2010 | All suicides in Swiss prisons                                                                                                                                           | TPP (mid-year)<br>External control | 50   | 19-60          |
| Hawton (2014) <sup>20</sup>       | England and Wales                                    | 2004-2009 | All suicides in prisons in England and Wales                                                                                                                            | TPP                                | 455  | ≥15            |
| Hayes (2012) <sup>18</sup>        | United States                                        | 2005-2006 | Suicides in 205 detention facilities and 52 holding facilities in US                                                                                                    | TPP<br>External control            | 464  | Youngest <17   |
| Huey (2008) <sup>22</sup>         | United States                                        | 2000      | All suicides in state and private facilities (excludes federal)                                                                                                         | ADP                                | 172  | Not reported   |
| Humber (2011) <sup>23</sup>       | England and Wales                                    | 1999-2007 | All suicides in prisons in England and Wales                                                                                                                            | AAP                                | 766  | 15-75          |

|                                       |                                |                         |                                                                       |                                    |      |                            |
|---------------------------------------|--------------------------------|-------------------------|-----------------------------------------------------------------------|------------------------------------|------|----------------------------|
| Kim (2007) <sup>24</sup>              | United States                  | 1995-2004               | Suicides in all prisons in USA                                        | ADP                                | 19   | Not reported               |
| Morthorst (2020) <sup>25</sup>        | Denmark,<br>Norway,<br>Iceland | 2000-2016               | All suicides in prisons in Denmark, Norway<br>and Iceland             | Person-years in<br>prison          | 167  | 15 - >55                   |
| Mumola (2005) <sup>26</sup>           | United States                  | 2000-2002               | Suicides in all prisons in USA                                        | ADP                                | 1770 | Youngest<18,<br>oldest ≥55 |
| O'Driscoll (2007) <sup>27</sup>       | Australia                      | 1995-2005               | All suicides in New South Wales prisons                               | ADP (mid-year)<br>External control | 92   | ≥18                        |
| Opitz-Welke<br>(2013) <sup>28</sup>   | Germany                        | 2000-2011               | All suicides in German prisons                                        | TPP                                | 960  | Youngest<20,<br>oldest>60  |
| Opitz-Welke<br>(2016) <sup>29</sup>   | Germany                        | 2000-2013               | All suicides in German prisons (pretrial and<br>criminal custody)     | TPP                                | 1067 | Not reported               |
| Opitz-Welke<br>(2019) <sup>30</sup>   | Germany                        | 2000-2013               | All suicides in German prisons                                        | TPP                                | 1067 | Not reported               |
| Patterson (2008) <sup>31</sup>        | United States                  | 1999-2004               | Suicides in all prisons in USA                                        | TPP (mid-year)<br>External control | 154  | Youngest<18,<br>oldest>50  |
| Preti (2006) <sup>32</sup>            | Italy                          | 1990-2002               | All suicides in Italian prisons                                       | ADP                                | 642  | 18 – 65                    |
| Radeloff (2015) <sup>33</sup>         | Germany                        | 2000-2010               | All suicides in German prisons                                        | Person-years                       | 860  | ≥14                        |
| Radeloff (2017) <sup>34</sup>         | Germany                        | 2000-2013               | All suicides of male sentenced prisoners (not<br>including pre-trial) | Person-years                       | 425  | 14-59                      |
| Radeloff (2019) <sup>35</sup>         | Germany                        | 2000 - 2016             | All suicides of male sentenced prisoners (not<br>including pre-trial) | Person-years                       | 524  | ≥14                        |
| Reeves (2014) <sup>36</sup>           | United States                  | 2005-2011               | All suicides in the New Jersey Department of<br>Corrections           | Total beds                         | 26   | Not reported               |
| Rivlin (2012) <sup>37</sup>           | England and<br>Wales           | 2007-<br>2009/1995-2009 | All suicide in prisons in England and Wales                           | TPP (mid-year)<br>External control | 121  | ≥18                        |
| Rosen (2011) <sup>38</sup>            | United States                  | 1995-2005               | All prisoners in North Carolina state prison                          | TPP                                | 31   | 20-79                      |
| Safer Custody<br>(2015) <sup>39</sup> | England and<br>Wales           | 1978-2014               | All suicides in prisons in England and Wales                          | AAP                                | 706  | ≥15                        |
| Safer Custody<br>(2020) <sup>40</sup> | England and<br>Wales           | 2015-2019               | All suicides in prisons in England and Wales                          | AAP                                | 463  | ≥15                        |

|                                |               |           |                                                                                            |                                                |      |                           |
|--------------------------------|---------------|-----------|--------------------------------------------------------------------------------------------|------------------------------------------------|------|---------------------------|
| Thomas (2018) <sup>41</sup>    | United States | 2000-2014 | All suicides in local jails                                                                | TPP<br>External control                        | 4508 | Youngest<17,<br>oldest>55 |
| Voulgaris (2019) <sup>42</sup> | Germany       | 2012-2017 | All suicides in prisons in Berlin                                                          | Total prison<br>population<br>External control | 24   | Not reported              |
| Wobeser (2002) <sup>43</sup>   | United States | 1990-1999 | All suicides in federal penitentiaries and provincial prisons, and police cells in Ontario | ADP<br>External control                        | 101  | Not reported              |

Abbreviations: AAP = average annual prison population (population at a predefined date in the year), ADP = average daily prison population (mean prison population, such as July 1 in the year), JIP = jail inmate profile, TPP = total prison population (total population at specific timepoint, for example, time of study). Unless otherwise stated, population consisted of remand/pretrial and sentenced prisoners.

**Appendix Table 2** Included studies from original review

| First author, year                                           | Location        | Period    | Population studied                                                                                                       | Control group                                                  | Cases, N | Controls, N |
|--------------------------------------------------------------|-----------------|-----------|--------------------------------------------------------------------------------------------------------------------------|----------------------------------------------------------------|----------|-------------|
| Group 1 studies                                              |                 |           |                                                                                                                          |                                                                |          |             |
| Blaauw (2005) <sup>44</sup>                                  | The Netherlands | 1987–1998 | Suicides in detained and sentenced prisoners in the Netherlands (including jails, prisons and 10 treatment institutions) | Randomly selected jail inmates                                 | 95       | 247         |
| Bourgoin (1993) <sup>45</sup>                                | France          | 1990-1992 | Suicides in prisons (pretrial and sentenced)                                                                             | Randomly selected inmates                                      | 179      | 360         |
| Dahle (2005) <sup>46</sup>                                   | Germany         | 1991-2000 | Suicides of pretrial detainees in a Berlin prison                                                                        | Matched by date of reception same prison                       | 30       | 30          |
| Fruehwald (2004) <sup>47</sup>                               | Austria         | 1975-1999 | Suicides of pretrial, sentenced or mentally disordered prisoners in correctional institutions.                           | Matched for age, gender, nationality, institution and sentence | 220      | 440         |
| Kerkhof (1990) <sup>48</sup>                                 | The Netherlands | 1973-1984 | Suicides of detained or sentenced prisoners                                                                              | Randomly selected controls                                     | 44       | 54          |
| Lupei (1981) <sup>49</sup>                                   | USA             | 1977-1979 | Suicides in Oklahoma state jails                                                                                         | For each case, control = last prisoner released on prior day   | 21       | 21          |
| Phillips (1986) <sup>50</sup>                                | UK              | 1973-1983 | Suicides of male prisoners in a London prison                                                                            | One in 200 index cards from prison population 1975 onwards     | 34       | 214         |
| Winter (2003) <sup>51</sup>                                  | USA             | 1980-1998 | Suicides of detained or sentenced prisoners in county jail                                                               | Random sample jail admissions                                  | 103      | 104         |
| Group 2 studies (total or average prison population control) |                 |           |                                                                                                                          |                                                                |          |             |
| Anno (1985) <sup>52</sup>                                    | USA             | 1980-1985 | All suicides in Texas Department of Corrections prisons                                                                  | ADP                                                            | 38       |             |

|                                                          |                |                         |                                                                                           |                          |     |  |
|----------------------------------------------------------|----------------|-------------------------|-------------------------------------------------------------------------------------------|--------------------------|-----|--|
| Backett (1987) <sup>53</sup>                             | Scotland       | 1970-1982               | Suicides of remand and sentenced prisoners in Scotland                                    | TPP                      | 33  |  |
| Bogue (1995) <sup>54</sup>                               | Scotland       | 1976-1993               | All suicides in Scottish prisons                                                          | ADP 1976-1979, 1980-1983 | 83  |  |
| Crichton (1997) <sup>55</sup>                            | England, Wales | 1988-1990 and 1994-1995 | All suicides in prisons in England and Wales                                              | ADP                      | 197 |  |
| Scott-Denoan (1984) <sup>56</sup>                        | Canada         | 1970-1980               | All suicides in British Columbia correctional facilities (remand and sentenced)           | TPP                      | 35  |  |
| Dooley (1990) <sup>57</sup>                              | England, Wales | 1972-1987               | All suicides in prisons in England and Wales (including remand and youth custody centers) | AAP                      | 295 |  |
| DuRand (1995) <sup>58</sup>                              | USA            | 1967-1992               | All suicides in a large (1700-bed) jail in Detroit                                        | TPP                      | 37  |  |
| Frickey (1999) <sup>59</sup>                             | USA            | 1993-1997               | All suicides in federal prisons                                                           | TPP 1997                 | 61  |  |
| Fruehwald (2000) <sup>60</sup>                           | Austria        | 1975-1997               | All suicides in correctional facilities                                                   | ADP                      | 220 |  |
| Hatty (1986) <sup>61</sup>                               | Australia      | 1980-1985               | All suicides in Australian prisons                                                        | TPP                      | 77  |  |
| Hayes (1989) <sup>62</sup>                               | USA            | 1979-1986               | All suicides in county jails and city/police department lockups                           | Jail inmate profile 1983 | 854 |  |
| Hurley (1989) <sup>63</sup>                              | Australia      | 1973-1987               | All suicides in prisons in Brisbane                                                       | AAP                      | 20  |  |
| Kovaszny (2004) <sup>64</sup>                            | USA            | 1993-1999               | All suicides in New York State prisons                                                    | TPP                      | 76  |  |
| Laishes (1997) <sup>65</sup>                             | Canada         | 1992-1996               | All suicides in federal prisons                                                           | TPP 1994                 | 66  |  |
| New York State Medical Review Board (1998) <sup>66</sup> | USA            | 1993-1997               | All suicides in in state correctional facilities in New York                              | TPP                      | 50  |  |
| National Association for the                             | England, Wales | 1980-1989               | All suicides in prisons in England and Wales                                              | ADP                      | 242 |  |

|                                                         |                |             |                                                                                                                        |                             |     |  |
|---------------------------------------------------------|----------------|-------------|------------------------------------------------------------------------------------------------------------------------|-----------------------------|-----|--|
| Care and Resettlement of Offenders (1990) <sup>67</sup> |                |             |                                                                                                                        |                             |     |  |
| Safer Custody Group (2005) <sup>68</sup>                | England, Wales | 2004-2005   | All suicides in prisons in England and Wales                                                                           | TPP                         | 85  |  |
| Safer Custody Group (2007) <sup>69</sup>                | England, Wales | 1999-2004   | All suicides in prisons in England and Wales                                                                           | TPP                         | 442 |  |
| Salive (1989) <sup>70</sup>                             | USA            | 1979-1987   | All suicides in Maryland prisons, Baltimore – suicides in prisoners convicted and sentenced to $\geq 1$ year of prison | TPP census                  | 37  |  |
| Snow (2002) <sup>71</sup>                               | England, Wales | 1996-2001   | All suicides in prisons in England and Wales                                                                           | TPP                         | 451 |  |
| Tatarelli (1999) <sup>72</sup>                          | Italy          | 1996-1997   | All suicides in prisons in Italy                                                                                       | TPP 1996-1997               | 100 |  |
| Towl (1998) <sup>73</sup>                               | England, Wales | 1988 - 1995 | All suicides in prisons in England and Wales                                                                           | TPP                         | 377 |  |
| White (2002) <sup>74</sup>                              | USA            | 1993-1997   | All suicides in federal prisons                                                                                        | TPP                         | 62  |  |
| He (2001) <sup>75</sup>                                 | USA            | 1996-1997   | All suicides in 20 of 107 institutional division prison units of Texas criminal justice system                         | TPP                         | 25  |  |
| Skegg (1993) <sup>76</sup>                              | New Zealand    | 1973 - 1988 | Suicides in all prisons in New Zealand (remand and custodial)                                                          | TPP receptions <sup>a</sup> | 39  |  |
| Novick (1978) <sup>77</sup>                             | USA            | 1971-1976   | Suicides in in New York City correctional facilities                                                                   | 1420 admissions in 1975     | 52  |  |

**Notes:** <sup>a</sup> receptions = number of prisoners entering prison. Abbreviations: AAP = average annual prison population (at a defined date in the year, such as 1 July in the year), ADP = average daily prison population/mean prison population, TPP = total prison population (total population at specific timepoint, for example, time of study).

Appendix Table 3. Characteristics of updated studies on additional risk factors associated with suicide in prison

| Categories              | Risk factor                                                                              | Study group <sup>a</sup> | Number of Studies | n, case | N, case | n, control | N, control | Odds Ratio | 95% CI   | z         | p-value | I <sup>2</sup> (%) |
|-------------------------|------------------------------------------------------------------------------------------|--------------------------|-------------------|---------|---------|------------|------------|------------|----------|-----------|---------|--------------------|
| <b>Demographic</b>      | Age 25+ <sup>1</sup>                                                                     | 2                        | 8                 | 12019   | 14714   | 11648      | 14714      | 1.2        | 0.9-1.7  | 1.19      | .24     | 95.1               |
|                         | Age 30+ <sup>3,9,12</sup>                                                                | 2                        | 3                 | 1344    | 2142    | 1352       | 2142       | 1.2        | 0.8-1.9  | 0.74      | .46     | 81.0               |
|                         | Age 40+ <sup>28</sup>                                                                    | 2                        | 1                 | 353     | 960     | 288        | 960        | 1.4        | 1.2-1.7  | 3.61      | <.0003  | -                  |
|                         | Age 45+ <sup>6,7,27,41</sup>                                                             | 2                        | 6                 | 3003    | 13324   | 2679       | 13324      | 0.8        | 0.6-1.1  | -<br>1.29 | .20     | 95.9               |
|                         | Catholic religion <sup>47</sup>                                                          | 1                        | 1                 | 165     | 219     | 319        | 404        | 0.8        | 0.6-1.2  | -<br>1.03 | .30     | -                  |
|                         | Not being a citizen of the country of incarceration <sup>4,10,14-16,19,27,30,32,40</sup> | 2                        | 10                | 885     | 4133    | 998        | 4133       | 0.7        | 0.6-1.0  | -<br>2.27 | .023    | 73.7               |
| <b>Criminal history</b> | Length of sentence less than 6 mo <sup>27</sup>                                          | 2                        | 1                 | 29      | 40      | 37         | 40         | 0.2        | 0.1-0.8  | -<br>2.21 | .027    | -                  |
|                         | Length of sentence less than 12 mo <sup>14,39,40</sup>                                   | 2                        | 3                 | 185     | 1024    | 154        | 1024       | 1.3        | 0.8-2.0  | 1.19      | .23     | 69.4               |
|                         | Length of sentence less than 48 mo <sup>13</sup>                                         | 2                        | 1                 | 115     | 205     | 125        | 205        | 0.8        | 0.6-1.2  | -<br>1.00 | .32     | -                  |
|                         | Longer than 1 yr served <sup>7,48</sup>                                                  | 2                        | 2                 | 49      | 165     | 50         | 175        | 2.2        | 0.1-67.1 | 0.44      | .66     | 97.0               |
|                         | Previous violent conviction <sup>1</sup>                                                 | 1                        | 1                 | 92      | 209     | 48         | 218        | 2.8        | 1.8-4.2  | 4.77      | <.0001  | -                  |
| <b>Clinical</b>         | History of drug misuse <sup>1</sup>                                                      | 1                        | 1                 | 101     | 220     | 100        | 220        | 1.0        | 0.7-1.5  | 0.10      | .92     | -                  |
|                         | History of psychiatric diagnosis <sup>1</sup>                                            | 1                        | 1                 | 101     | 206     | 42         | 220        | 4.1        | 2.6-6.3  | 6.36      | <.0001  | -                  |
|                         | Referred to psychiatrist during                                                          | 1                        | 1                 | 95      | 220     | 30         | 214        | 4.7        | 2.9-7.5  | 6.43      | <.0001  | -                  |

|                      |                                                             |   |   |     |     |    |     |      |          |      |        |   |
|----------------------|-------------------------------------------------------------|---|---|-----|-----|----|-----|------|----------|------|--------|---|
|                      | prison term <sup>11</sup>                                   |   |   |     |     |    |     |      |          |      |        |   |
|                      | Previous psychiatric inpatient admission <sup>1</sup>       | 1 | 1 | 54  | 208 | 14 | 219 | 5.1  | 2.8-9.6  | 5.14 | <.0001 | - |
|                      | Hospitalization <sup>14</sup>                               | 2 | 1 | 131 | 377 | 86 | 377 | 1.8  | 1.3-2.5  | 3.60 | .0003  | - |
|                      | Criminally not responsible <sup>16</sup>                    | 2 | 1 | 47  | 153 | 12 | 153 | 5.2  | 2.6-10.3 | 4.74 | <.001  | - |
|                      | Mental health concerns documented at reception <sup>1</sup> | 1 | 1 | 65  | 220 | 11 | 220 | 8.0  | 4.1-15.6 | 6.05 | <.0001 | - |
|                      | Self-harm risk document open <sup>1</sup>                   | 1 | 1 | 118 | 220 | 31 | 220 | 7.1  | 4.4-11.2 | 8.27 | <.0001 | - |
|                      | Previous MHS contact <sup>1</sup>                           | 1 | 1 | 104 | 220 | 39 | 220 | 4.2  | 2.7-6.4  | 6.41 | <.0001 | - |
|                      | High secure cell <sup>10</sup>                              | 2 | 1 | 1   | 29  | 3  | 29  | 1.0  | 0.1-16.8 | 0.00 | 1.00   | - |
| <b>Institutional</b> | Adjudication <sup>1</sup>                                   | 1 | 1 | 74  | 211 | 64 | 220 | 1.3  | 0.9-2.0  | 1.33 | .18    | - |
|                      | Disciplinary cell <sup>14</sup>                             | 2 | 1 | 30  | 377 | 3  | 377 | 10.8 | 3.3-35.6 | 3.90 | <.0001 | - |

<sup>a</sup> group 1 studies using a randomly selected or matched control group and group 2 studies using the total/average prison population during a matched period.



**Appendix Table 4. OHAT scale for assessment of quality of included studies.**

| Studies                                  | Comparison Group | Confounding* | Complete outcome data | Exposure characterization | Outcome assessment | Outcome reporting | Other threats |
|------------------------------------------|------------------|--------------|-----------------------|---------------------------|--------------------|-------------------|---------------|
| Anno (1985)                              | +                | -            | ++                    | +                         | +                  | ++                | -             |
| Austin (2014)                            | +                | -            | ++                    | +                         | +                  | ++                | -             |
| Backett (1987)                           | +                | -            | +                     | -                         | -                  | +                 | +             |
| Baillargeon (2009)                       | ++               | +            | +                     | ++                        | +                  | ++                | +             |
| Bedoya (2009)                            | +                | -            | +                     | +                         | +                  | ++                | -             |
| Betz (2011)                              | +                | -            | +                     | +                         | +                  | ++                | +             |
| Bird (2008)                              | +                | -            | ++                    | +                         | +                  | ++                | +             |
| Blaauw (2005)                            | ++               | -            | ++                    | +                         | +                  | ++                | ++            |
| Bogue (1995)                             | +                | +            | +                     | ++                        | ++                 | +                 | +             |
| Bourgoin (1993)                          | +                | +            | +                     | ++                        | ++                 | +                 | +             |
| Brittain (2013)/NY correctional services | +                | -            | -                     | +                         | ++                 | ++                | +             |
| Carson (2020)                            | +                | -            | +                     | +                         | +                  | ++                | +             |
| Carson (2020)                            | +                | -            | +                     | +                         | +                  | ++                | +             |
| Castelpietra (2018)                      | +                | -            | +                     | +                         | -                  | +                 | +             |
| Choi (2019)                              | +                | -            | +                     | +                         | ++                 | ++                | +             |
| Crichton (1997)                          | +                | -            | -                     | -                         | -                  | -                 | -             |
| Dahle (2005)                             | ++               | +            | +                     | +                         | +                  | +                 | +             |
| Daniel (2006)                            | +                | -            | +                     | +                         | +                  | ++                | -             |
| Dooley (1990)                            | +                | +            | ++                    | ++                        | ++                 | ++                | +             |
| DuRand (1995)                            | +                | +            | -                     | -                         | +                  | +                 | -             |
| Duthe (2013)                             | ++               | ++           | -                     | +                         | +                  | ++                | +             |
| Duthe (2014)                             | ++               | ++           | ++                    | +                         | +                  | ++                | +             |
| Esposito (2017)                          | -                | -            | +                     | +                         | +                  | +                 | -             |
| Favril (2018)                            | +                | -            | ++                    | +                         | ++                 | ++                | +             |
| Fazel (2017)                             | +                | +            | +                     | +                         | -                  | ++                | +             |
| Frickey (1999)                           | +                | +            | +                     | +                         | +                  | ++                | +             |
| Fritz (2020)                             | +                | -            | -                     | +                         | -                  | +                 | +             |
| Fruehwald (2000)                         | +                | +            | +                     | +                         | +                  | ++                | +             |
| Fruehwald (2004)                         | ++               | ++           | ++                    | +                         | ++                 | ++                | ++            |
| Gauthier (2015)                          | +                | -            | ++                    | +                         | ++                 | ++                | +             |
| Hatty (1986)                             | +                | +            | +                     | +                         | ++                 | ++                | +             |
| Hawton (2014)                            | +                | +            | +                     | +                         | ++                 | ++                | +             |
| Hayes (1989)                             | +                | +            | +                     | +                         | +                  | ++                | +             |
| Hayes (2012)                             | +                | -            | ++                    | +                         | ++                 | ++                | -             |
| He (2001)                                | +                | +            | ++                    | +                         | ++                 | ++                | -             |
| Huey (2008)                              | +                | -            | +                     | +                         | -                  | ++                | +             |
| Humber (2011)                            | +                | +            | +                     | +                         | ++                 | ++                | +             |
| Humber (2013)                            | ++               | ++           | ++                    | +                         | ++                 | ++                | ++            |
| Hurley (1989)                            | +                | -            | +                     | -                         | +                  | +                 | +             |

|                                                                                 |    |   |    |    |    |    |    |
|---------------------------------------------------------------------------------|----|---|----|----|----|----|----|
| Kerkhof (1990)                                                                  | ++ | + | ++ | +  | +  | ++ | ++ |
| Kim (2007)                                                                      | +  | - | ++ | +  | ++ | ++ | -  |
| Kovaszny (2004)                                                                 | +  | + | +  | +  | +  | +  | +  |
| Laishes (1997)                                                                  | +  | - | -  | -  | -  | -  | -  |
| Lupei (1981)                                                                    | ++ | + | ++ | ++ | +  | ++ | +  |
| Morthorst (2020)                                                                | +  | - | +  | +  | -  | ++ | +  |
| Mumola (2005)                                                                   | +  | - | +  | +  | +  | ++ | +  |
| National Association for<br>the Care and<br>Resettlement of<br>Offenders (1990) | +  | - | +  | +  | +  | ++ | +  |
| New York State Medical<br>Review Board (1998)                                   | +  | - | +  | +  | +  | ++ | +  |
| Novick (1978)                                                                   | +  | + | ++ | +  | ++ | ++ | +  |
| O'Driscoll (2007)                                                               | +  | - | ++ | +  | ++ | ++ | +  |
| Opitz-Welke (2013)                                                              | +  | - | +  | +  | +  | ++ | +  |
| Opitz-Welke (2016)                                                              | +  | - | +  | +  | +  | ++ | -  |
| Opitz-Welke (2019)                                                              | +  | - | +  | +  | +  | ++ | +  |
| Patterson (2008)                                                                | +  | - | +  | +  | +  | ++ | +  |
| Phillips (1986)                                                                 | +  | - | +  | +  | +  | ++ | +  |
| Preti (2006)                                                                    | +  | - | +  | +  | ++ | ++ | +  |
| Radeloff (2015)                                                                 | +  | + | -  | +  | +  | ++ | +  |
| Radeloff (2017)                                                                 | +  | + | +  | +  | +  | ++ | +  |
| Radeloff (2019)                                                                 | +  | + | +  | +  | +  | ++ | +  |
| Reeves (2014)                                                                   | -  | - | -  | +  | +  | ++ | +  |
| Rivlin (2012)                                                                   | +  | - | +  | +  | ++ | ++ | +  |
| Rosen (2011)                                                                    | +  | + | +  | +  | ++ | ++ | +  |
| Safer Custody (2015)                                                            | +  | - | +  | +  | ++ | ++ | +  |
| Safer Custody (2020)                                                            | +  | - | +  | +  | ++ | ++ | +  |
| Salive (1989)                                                                   | +  | + | ++ | ++ | ++ | ++ | +  |
| Scott-Denoon (1984)                                                             | +  | - | +  | +  | ++ | ++ | +  |
| Skegg (1993)                                                                    | +  | - | +  | +  | ++ | ++ | +  |
| Snow (2002)                                                                     | +  | - | +  | +  | ++ | ++ | +  |
| Tatarelli (1999)                                                                | +  | - | -  | -  | -  | -  | -  |
| Thomas (2018)                                                                   | +  | - | +  | +  | +  | ++ | +  |
| Towl (1998)                                                                     | +  | + | ++ | ++ | +  | ++ | +  |
| Voulgaris (2019)                                                                | +  | - | +  | +  | ++ | ++ | +  |
| White (2002)                                                                    | +  | + | ++ | +  | +  | ++ | +  |
| Winter (2003)                                                                   | +  | + | ++ | +  | +  | +  | +  |
| Wobeser (2002)                                                                  | +  | - | +  | +  | ++ | ++ | -  |

Note: ++ refers to Definitely Low, + refers to Probably Low, - refers to Probably High, - - refers to Definitely High. \*A definitely/probably low risk of bias for confounding indicates there was adjustment for in some part of the study design or analysis, it does not indicate that adjusted odds ratios were reported, or could be extracted from the studies.

**Appendix Table 5. Differences between adjusted and crude odds ratio on identified risk factors.**

| <b>Risk factor</b>            | <b>Number of Studies</b> | <b>Adjusted odds ratio (95% CI)</b> | <b>Crude odds ratio (95% CI)</b> | <b>Q</b> | <b>p-value</b> |
|-------------------------------|--------------------------|-------------------------------------|----------------------------------|----------|----------------|
| Married                       | 10                       | 1.4 (1.0-1.9)                       | 1.5 (1.2-1.8)                    | 0.1      | .751           |
| Employed                      | 5                        | 0.5 (0.3-0.8)                       | 2.7 (1.7-4.4)                    | 25.1     | <.0001         |
| Previous conviction           | 5                        | 0.9 (0.7-1.3)                       | 2.3 (0.6-8.6)                    | 1.7      | .190           |
| Current psychiatric diagnosis | 7                        | 5.3 (3.2-8.8)                       | 7.1 (2.6-19.1)                   | 0.3      | .604           |
| History of self-harm          | 5                        | 6.3 (4.0-10.2)                      | 9.1 (2.8-29.8)                   | 0.3      | .572           |
| Single cell occupancy         | 3                        | 4.7 (1.5-14.5)                      | 30.4 (5.2-178.4)                 | 3.0      | .0817          |
| No social visits              | 3                        | 1.6 (1.2-2.1)                       | 2.3 (1.6-3.1)                    | 2.5      | .115           |

## References:

- 1 Humber N, Webb R, Piper M, Appleby L, Shaw J. A national case-control study of risk factors among prisoners in England and Wales. *Soc Psychiatry Psychiatr Epidemiol* 2013; **48**: 1177–85.
- 2 Austin AE, van den Heuvel C, Byard RW. Prison Suicides in South Australia: 1996-2010. *J Forensic Sci* 2014; **59**: 1260–2.
- 3 Baillargeon J, Penn JV, Thomas CR, Temple JR, Baillargeon G, Murray OJ. Psychiatric Disorders and Suicide in the Nation’s Largest State Prison System. *J Am Acad Psychiatry Law* 2009; **37**: 6.
- 4 Bedoya A, Martínez-Carpio PA, Humet V, Leal MJ, Lleopart N. Incidencia del suicidio en las prisiones de Cataluña: análisis descriptivo y comparado. *Rev Esp Sanid Penit* 2009; **11**. DOI:10.4321/S1575-06202009000200002.
- 5 Betz ME, Krzyzaniak SM, Hedegaard H, Lowenstein SR. Completed Suicides in Colorado: Differences between Hispanics and Non-Hispanic Whites: Hispanic Ethnicity and Suicide in Colorado. *Suicide Life Threat Behav* 2011; **41**: 445–52.
- 6 Bird SM. Changes in male suicides in Scottish prisons: 10-year study. *Br J Psychiatry* 2008; **192**: 446–9.
- 7 Brittain J, Axelrod G, Venters H. Deaths in New York City Jails, 2001–2009. *Am J Public Health* 2013; **103**: 638–40.
- 8 Carson EA, Cowhig MP. Mortality in Local Jails, 2000-2016 - Statistical Tables. *Stat Tables* 2020; : 30.
- 9 Carson EA, Cowhig MP. Mortality in State and Federal Prisons, 2001-2016 - Statistical Tables. *Stat Tables* 2020; : 25.
- 10 Castelpietra G, Egidi L, Caneva M, *et al*. Suicide and suicides attempts in Italian prison epidemiological findings from the “Triveneto” area, 2010–2016. *Int J Law Psychiatry* 2018; **61**: 6–12.
- 11 Choi NG, DiNitto DM, Marti CN. Suicide Decedents in Correctional Settings: Mental Health Treatment for Suicidal Ideation, Plans, and/or Attempts. *J Correct Health Care* 2019; **25**: 70–83.
- 12 Daniel AE, Fleming J. Suicides in a State Correctional System, 1992-2002: A Review. *J Correct Health Care* 2006. DOI:10.1177/1078345806287541.
- 13 Duthe G, Hazard A, Kensey A, Shon JL. Suicide among male prisoners in France: a prospective population-based study. *Forensic Sci Int* 2013; **233**: 273–7.
- 14 Duthé G, Hazard A, Kensey A, Wiles-Portier E. Trends and risk factors for prisoner suicide in France. *Population* 2014; **69**: 463–493.
- 15 Esposito M. Suicidal Risk in Italian Prisons. A Population-Based Cohort Study. *Sociol Mind* 2018; **8**: 46–69.

- 16 Favril L, Wittouck C, Audenaert K, Vander Laenen F. A 17-Year National Study of Prison Suicides in Belgium. *Crisis* 2019; **40**: 42–53.
- 17 Fazel S, Ramesh T, Hawton K. Suicide in prisons: an international study of prevalence and contributory factors. *Lancet Psychiatry* 2017; **4**: 946–52.
- 18 Fritz FD, Fazel S, Benavides Salcedo A, *et al.* 1324 prison suicides in 10 countries in South America: incidence, relative risks, and ecological factors. *Soc Psychiatry Psychiatr Epidemiol* 2020; published online May 13. DOI:10.1007/s00127-020-01871-3.
- 19 Gauthier S, Reisch T, Bartsch C. Swiss Prison Suicides Between 2000 and 2010: Can We Develop New Prevention Strategies Based on Detailed Knowledge of Suicide Methods? *Crisis* 2015; **36**: 110–6.
- 20 Hawton K, Linsell L, Adeniji T, Sariaslan A, Fazel S. Self-harm in prisons in England and Wales: an epidemiological study of prevalence, risk factors, clustering, and subsequent suicide. *Lancet* 2014; **383**: 1147–54.
- 21 Hayes LM. National Study of Jail Suicide: 20 Years Later. *J Correct Health Care* 2012; **18**: 233–45.
- 22 Huey MP. Deprivation, importation, and prison suicide. 2008; published online Aug. <http://athenaeum.libs.uga.edu/handle/10724/24926> (accessed Feb 23, 2020).
- 23 Humber N, Piper M, Appleby L, Shaw J. Characteristics of and trends in subgroups of prisoner suicides in England and Wales. *Psychol Med* 2011; **41**: 2275–85.
- 24 Kim S, Ting A, Puisis M, *et al.* Deaths in the Cook County Jail: 10-Year Report, 1995–2004. *J Urban Health* 2007; **84**: 70–84.
- 25 Morthorst BR, Mehlum L, Pålsson SP, *et al.* Suicide Rates in Nordic Prisons 2000–2016. *Arch Suicide Res* 2020; : 1–11.
- 26 Mumola CJ. Suicide And Homicide In State Prisons And Local Jails. 2005. DOI:10.1037/e479702006-001.
- 27 O’Driscoll C, Samuels A, Zacka M. Suicide in New South Wales Prisons, 1995–2005: Towards a Better Understanding. *Aust N Z J Psychiatry* 2007; **41**: 519–24.
- 28 Opitz-Welke A, Bennefeld-Kersten K, Konrad N, Welke J. Prison suicides in Germany from 2000 to 2011. *Int J Law Psychiatry* 2013; **36**: 386–9.
- 29 Opitz-Welke A, Bennefeldt-Kersten K, Konrad N, Welke J. Prison suicide in female detainees in Germany 2000–2013. *J Forensic Leg Med* 2016; **44**: 68–71.
- 30 Opitz-Welke A, Konrad N, Welke J, Bennefeld-Kersten K, Gauger U, Voulgaris A. Suicide in Older Prisoners in Germany. *Front Psychiatry* 2019; **10**: 154.
- 31 Patterson RF, Hughes K. Review of Completed Suicides in the California Department of Corrections and Rehabilitation, 1999 to 2004. *Psychiatr Serv* 2008; **59**: 676–682.

- 32 Preti A, Cascio MT. Prison Suicides and Self-harming Behaviours in Italy, 1990-2002. *Med Sci Law* 2006; **46**: 127–34.
- 33 Radeloff D, Lempp T, Herrmann E, Kettner M, Bennefeld-Kersten K, Freitag CM. National total Survey of German adolescent Suicide in Prison. *Eur Child Adolesc Psychiatry* 2015; **24**: 219–25.
- 34 Radeloff D, Lempp T, Kettner M, Rauf A, Bennefeld-Kersten K, Freitag CM. Male suicide rates in German prisons and the role of citizenship. *PLOS ONE* 2017; **12**: e0178959.
- 35 Radeloff D, Stoeber F, Lempp T, Kettner M, Bennefeld-Kersten K. Murderers or thieves at risk? Offence-related suicide rates in adolescent and adult prison populations. *PLOS ONE* 2019; **14**: e0214936.
- 36 Reeves R, Tamburello A. Single Cells, Segregated Housing, and Suicide in the New Jersey Department of Corrections. *J Am Acad Psychiatry Law* 2014; **42**: 5.
- 37 Rivlin A, Fazel S, Marzano L, Hawton K. Studying survivors of near-lethal suicide attempts as a proxy for completed suicide in prisons. *Forensic Sci Int* 2012; **220**: 19–26.
- 38 Rosen DL, Wohl DA, Schoenbach VJ. All-Cause and Cause-Specific Mortality Among Black and White North Carolina State Prisoners, 1995–2005. *Ann Epidemiol* 2011; **21**: 719–26.
- 39 Safer Custody Group. Analysis of Self-inflicted deaths in custody in England and Wales between 1978 and March 2014. London, United Kingdom: National Offender Management Service, 2015.
- 40 Safer Custody Group. Deaths in custody in England Wales, 1978-2019. London, United Kingdom: National Statistics, 2020 <https://www.gov.uk/government/collections/safety-in-custody-statistics> (accessed Feb 23, 2020).
- 41 Thomas AL, Scott J, Mellow J. The validity of open-source data when assessing jail suicides. *Health Justice* 2018; **6**: 11.
- 42 Voulgaris A, Hartwig S, Konrad N, Opitz-Welke A. Influence of drugs on prison suicide - A retrospective case study. *Int J Law Psychiatry* 2019; **66**: 101460.
- 43 Wobeser WL, Datema J, Bechard B, Ford P. Causes of death among people in custody in Ontario, 1990–1999. 2002; **167**: 1109–13.
- 44 Blaauw E, Kerkhof AJ, Hayes LM. Demographic, criminal, and psychiatric factors related to inmate suicide. *Suicide Life Threat Behav* 2005; **35**: 63–75.
- 45 Bourgoin N. La mortalité par suicide en prison. *Rev Epidem Santé Publ* 1993; **41**: 146–54.
- 46 Dahle K-P, Lohner JC, Konrad N. Suicide prevention in penal institutions: Validation and optimization of a screening tool for early identification of high-risk inmates in pretrial detention. *Int J Forensic Ment Health* 2005; **4**: 53–62.

- 47 Fruehwald S, Matschnig T, Koenig F, Bauer P, Frottier P. Suicide in custody: case-control study. *Br J Psychiatry* 2004; **185**: 494–498.
- 48 Kerkhof AJ, Bernasco W. Suicidal behavior in jails and prisons in the Netherlands: Incidence, characteristics, and prevention. *Suicide Life Threat Behav* 1990; **20**: 123–137.
- 49 Lupei RA. Jail suicides: Demographic and behavioral factors postdictive of the completed act. Oklahoma State University, 1981.
- 50 Phillips M. A study of suicides and attempted suicides at HMP Brixton, 1973-1983. Home Office: Home Office, 1986.
- 51 Winter MM. County jail suicides in a Midwestern state: Moving beyond the use of profiles. *Prison J* 2003; **83**: 130–148.
- 52 Anno BJ. Patterns of suicide in the Texas Department of Corrections 1980–1985. *J Prison Jail Health* 1985.
- 53 Backett SA. Suicide in Scottish prisons. *Br J Psychiatry* 1987; **151**: 218–221.
- 54 Bogue J, Power K. Suicide in Scottish Prisons, 1976-93. *J Forensic Psychiatry* 1995; **6**: 527–40.
- 55 Crighton D, Towl G. Self-inflicted deaths in prison in England and Wales: An analysis of the data for 1988–90 and 1994–95. *Issues Criminol Leg Psychol* 1997.
- 56 Scott-Denoon K. BC Corrections: A study of suicides 1970-1980. *Br Columbia Correct Branch* 1984.
- 57 Dooley E. Prison suicide in England and Wales, 1972–87. *Br J Psychiatry* 1990; **156**: 40–45.
- 58 DuRand CJ, Burtka GJ, Federman EJ, Haycox JA, Smith JW. A quarter century of suicide in a major urban jail: Implications for community psychiatry. *Am J Psychiatry* 1995; **152**: 1077–80.
- 59 Frickey RC. Suicide in the US Federal Prison System. Uniformed Services Univ of The Health Sciences Bethesda, 1999.
- 60 Fruehwald S, Frottier P, Eher R, Gutierrez K, Ritter K. Prison suicides in Austria, 1975-1997. *Suicide Life Threat Behav* 2000; **30**: 360–9.
- 61 Hatty S, Walker JR. A national study of deaths in Australian prisons. Australian Institute of Criminology Canberra, 1986.
- 62 Hayes LM. National Study of Jail Suicides: Seven Years Later. *Psychiatr Q* 1989; **60**: 7–29.
- 63 Hurley W. Suicides by prisoners. *Med J Aust* 1989; **151**: 188–190.
- 64 Kovasznay B, Miraglia R, Beer R, Way B. Reducing suicides in New York State correctional facilities. *Psychiatr Q* 2004; **75**: 61–70.

- 65 Laishes J. Inmate suicides in the Correctional Service of Canada. *Crisis* 1997; **18**: 157–162.
- 66 Epidemiology of Suicides in New York State Correctional Facilities. New York, NY: US Medical Review Board, 1998.
- 67 Suicide in Prison. London, United Kingdom: National Association for the Care and Resettlement of Offenders, 1990.
- 68 Self-Inflicted Deaths in Custody: Six-Year Over- view: 1999/2000 to 2004/2005 [internal report]. London, United Kingdom: National Offender Management Service, 2005.
- 69 Suicide Statistics on Sexual Offenders [from a database of self-inflicted deaths in England and Wales 1999/2000 to 2003/2004]. London, United Kingdom: National Offender Management Service, 2007.
- 70 Salive ME, Smith GS, Brewer TF. Suicide mortality in the Maryland state prison system, 1979 through 1987. *JAMA* 1989; **262**: 365–369.
- 71 Snow L, Paton J, Oram C, Teers R. Self-inflicted deaths during 2001: an analysis of trends. *Br J Forensic Pract* 2002; **4**.
- 72 Tatarelli R, Mancinelli I, Taggi F, Polidori G. Suicide in Italian prisons in 1996 and 1997: A descriptive epidemiological study. *Int J Offender Ther Comp Criminol* 1999; **43**: 438–447.
- 73 Towl GJ, Crighton DA. Suicide in prisons in England and Wales from 1988 to 1995. *Crim Behav Ment Health* 1998; **8**: 184–192.
- 74 White TW, Schimmel DJ, Frickey R. A comprehensive analysis of suicide in federal prisons: a fifteen-year review. *J Correct Health Care* 2002; **9**: 321–343.
- 75 He XY, Felthous AR, Rd HC, Nathan P, Veasey S. Factors in prison suicide: one year study in Texas. *J Forensic Sci* 2001; **46**: 896–901.
- 76 Skegg K, Cox B. Suicide in custody: occurrence in Maori and nonMaori New Zealanders. *N Z Med J* 1993; **106**: 1–3.
- 77 Novick LF, Remmlinger E. A study of 128 deaths in New York City correctional facilities (1971-1976): implications for prisoner health care. *Med Care* 1978; **16**: 749–756.
- 78 Noonan M. Mortality in State Prisons in U.S, 2001-2014. Department of Justice, 2016.
- 79 Noonan M. Mortality in Local Jails in U.S, 2000-2014. Department of Justice, 2016.
